# Supplementary material for: TMEM120A contains a specific coenzyme A-binding site and might not mediate poking- or stretch-induced channel activities in cells
Source: eLife journal article supplement (doi:10.7554/elife.71474), 2021-08-19
Supplement: figures [file elife-71474-figures-v2.pdf]

---

## Figures and figure supplements

TMEM120A contains a specific coenzyme A-binding site and might not mediate poking- or stretch-induced channel activities in cells

**Yao Rong *et al***

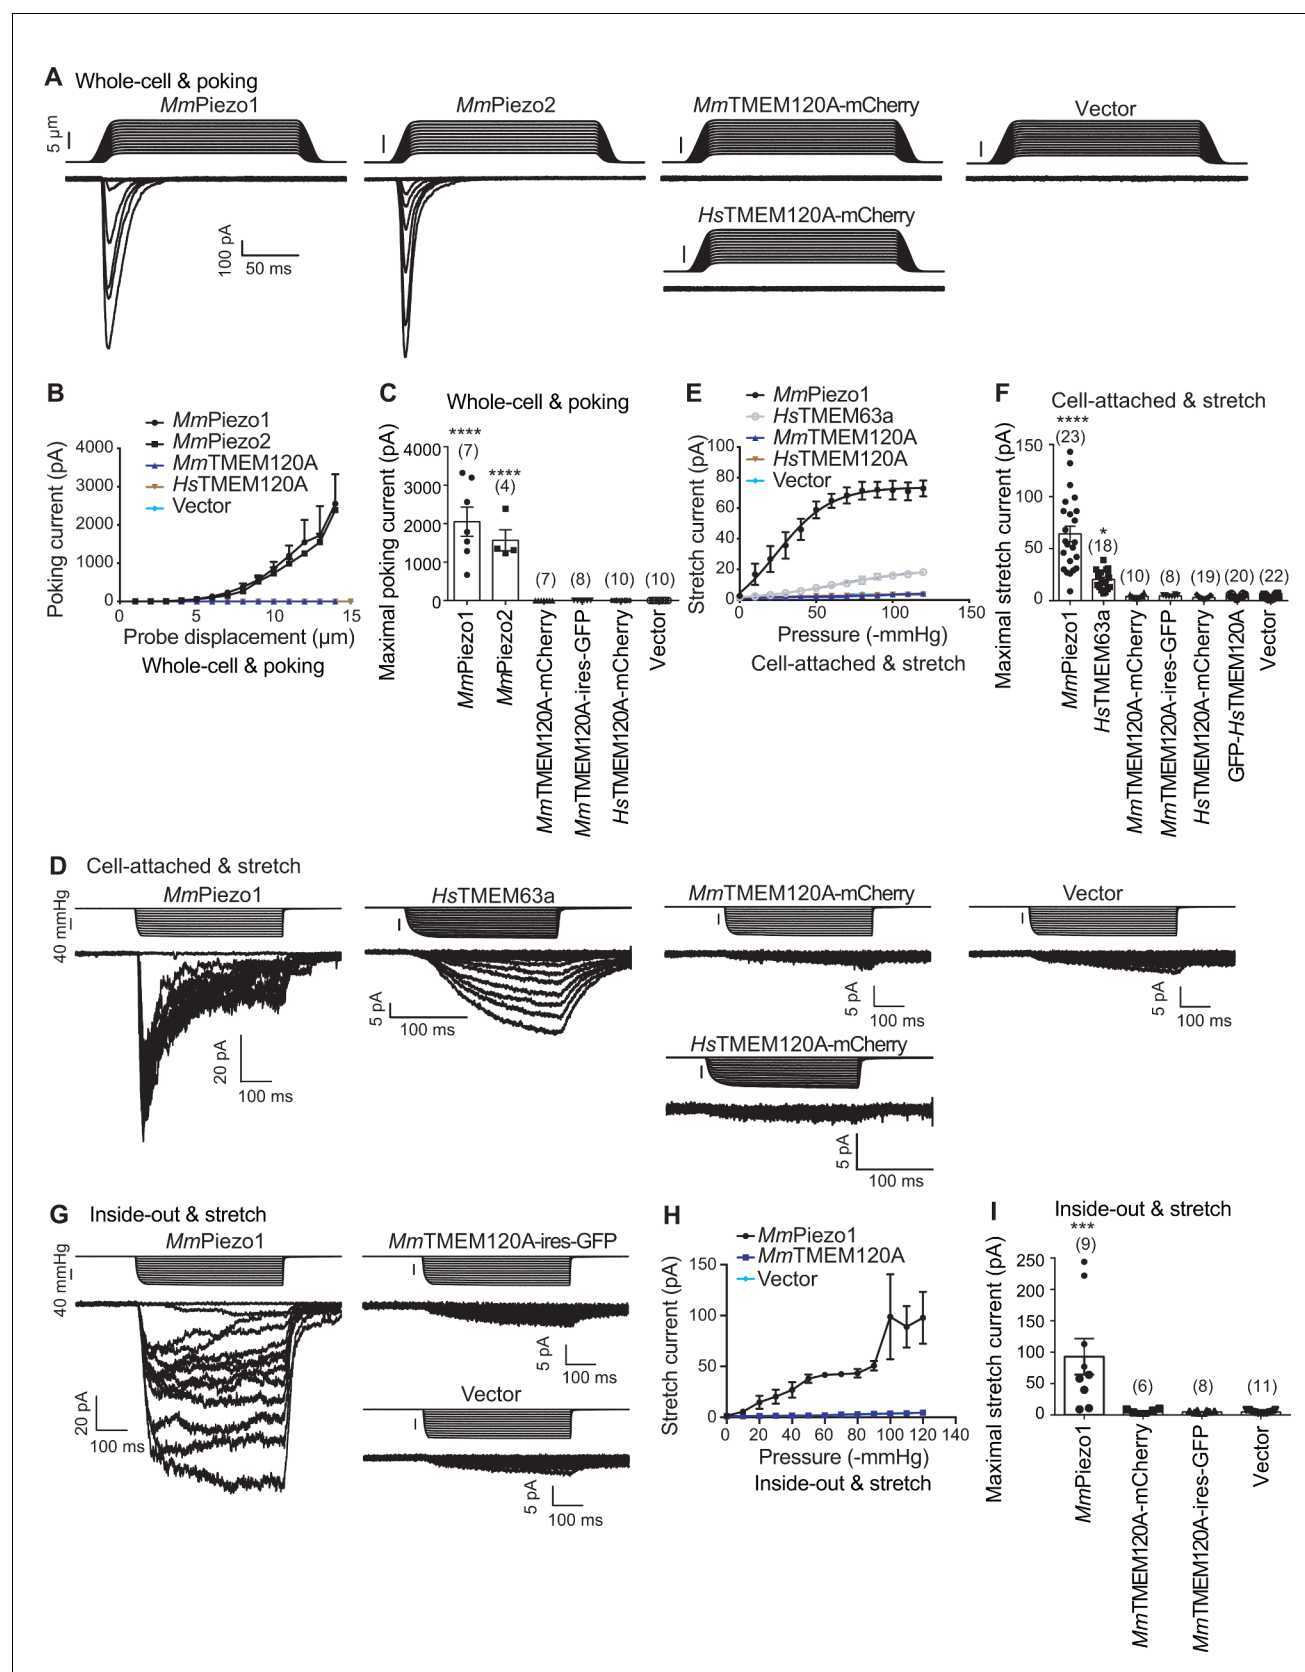

**Figure 1.** TMEM120A does not mediate poking- or stretch-induced currents in P1-KO-HEK cells. (A) Representative poking-evoked whole-cell currents from P1-KO-HEK cells transfected with the indicated constructs. (B) Current-displacement curves showing poking-evoked whole-cell currents from P1-KO-HEK cells transfected with the indicated constructs. (C) Summary graph of maximal poking current. (D) Representative stretch-evoked cell-attached currents from P1-KO-HEK cells transfected with the indicated constructs. (E) Stretch current-pressure curves showing stretch-evoked cell-attached currents from P1-KO-HEK cells transfected with the indicated constructs. (F) Summary graph of maximal stretch current. (G) Representative stretch-evoked inside-out currents from P1-KO-HEK cells transfected with the indicated constructs. (H) Stretch current-pressure curves showing stretch-evoked inside-out currents from P1-KO-HEK cells transfected with the indicated constructs. (I) Summary graph of maximal stretch current. Figure 1 continued on next page

## Figure 1 continued

KO-HEK cells transfected with the indicated constructs in response to the increased probe displacement steps. The *Mm*TMEM120A group includes data from both *Mm*TMEM120A-mCherry- and *Mm*TMEM120A-ires-GFP-transfected cells. (C) Scatter plot of the maximal poking-evoked whole-cell currents. (D) Representative stretch-induced currents from P1-KO-HEK cells transfected with the indicated constructs under the cell-attached patch configuration. (E) Current-pressure curves showing stretch-induced currents under cell-attached patch configuration from P1-KO-HEK cells transfected with the indicated constructs in response to the increased negative pressures. The *Mm*TMEM120A group includes data from both *Mm*TMEM120A-mCherry- and *Mm*TMEM120A-ires-GFP-transfected cells, while the *Hs*TMEM120A group includes data from both *Hs*TMEM120A-mCherry- and GFP-*Hs*TMEM120A-transfected cells. (F) Scatter plot of the maximal stretch-induced currents. (G) Representative stretch-induced currents from P1-KO-HEK cells transfected with the indicated constructs under the inside-out patch configuration. (H) Current-pressure curves showing stretch-induced currents under inside-out patch configuration from P1-KO-HEK cells transfected with the indicated constructs in response to the increased negative pressures. (I) Scatter plot of the maximal stretch-induced currents. In panels (C), (F), and (I), each bar represents mean  $\pm$  sem, and the recorded cell number is labeled above the bar. One-way analysis of variance (ANOVA) with comparison to the vector. \*\*\* $p < 0.001$ ; \*\*\*\* $p < 0.0001$ .

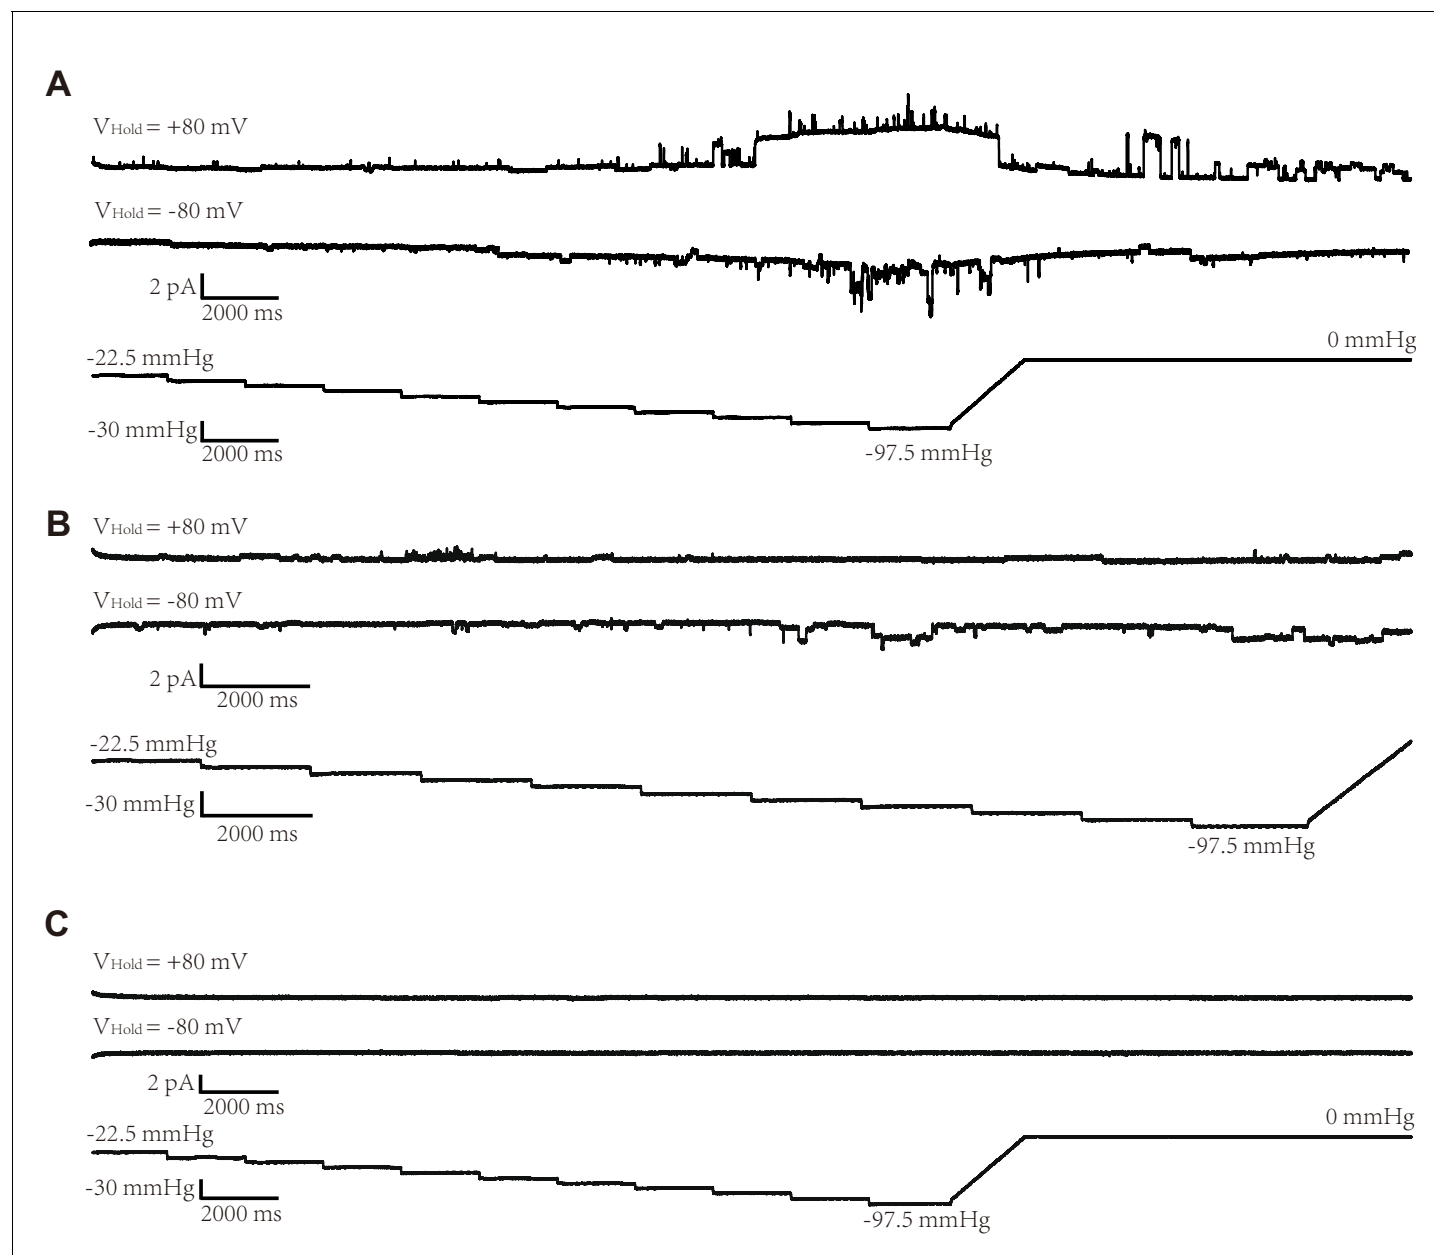

**Figure 1—figure supplement 1.** Representative excised inside-out patch recordings of *HsTMEM120A* reconstituted in GUVs. (A) Traces of ion channel activities responding to the increase of negative pressure at both +80 and −80 mV. (B) A different patch of membrane exhibiting distinct behaviors of ion channel activities at +80 and −80 mV. While the trace recorded at −80 mV exhibits stimulated channel activities in response to increasing pressures, the one at +80 mV appears to be insensitive to increasing pressure. (C) A silent patch with no pressure-dependent ion channel activities. The traces from three representative patches were obtained by holding the patch at −80 mV and +80 mV with a pressure pulse protocol shown at the bottom: −22.5 to −97.5 mmHg with −7.5 mmHg step. All recordings were performed with a symmetrical pipette and a bath solution containing 500 mM NaCl, 10 mM  $\text{CaCl}_2$ , and 10 mM 4-(2-hydroxyethyl)-1-piperazineethanesulfonic acid (HEPES) (pH 7.4, ~300 Osm/l).



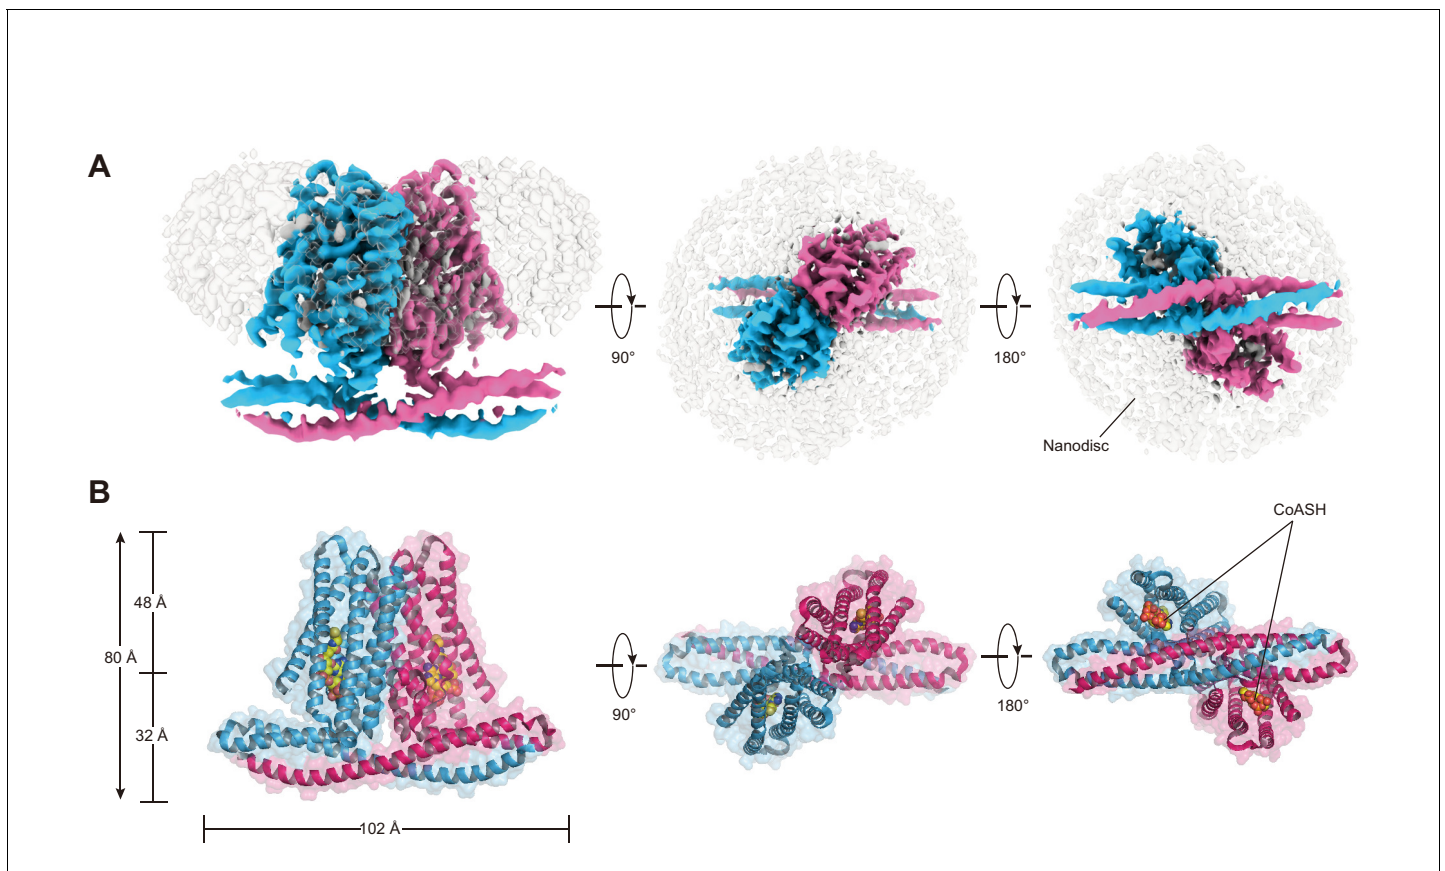

**Figure 2.** Cryo-EM density and overall architecture of *HsTMEM120A* homodimer in complex with CoASH molecules. **(A)** Cryo-electron microscopy (cryo-EM) density of *HsTMEM120A*-CoASH complex dimer embedded in a lipid nanodisc. The densities of two *HsTMEM120A* protein subunits are colored blue and pink, while those of coenzyme A (CoASH) and the lipid nanodisc are colored silver. Side view along membrane plane, top view from extracellular side, and bottom view from intracellular side are shown from left to right. **(B)** Cartoon representations of the *HsTMEM120A*-CoASH complex structure. The proteins are shown as cartoon models, whereas CoASH molecules are presented as sphere models. The views are the same as the corresponding ones in **(A)**.

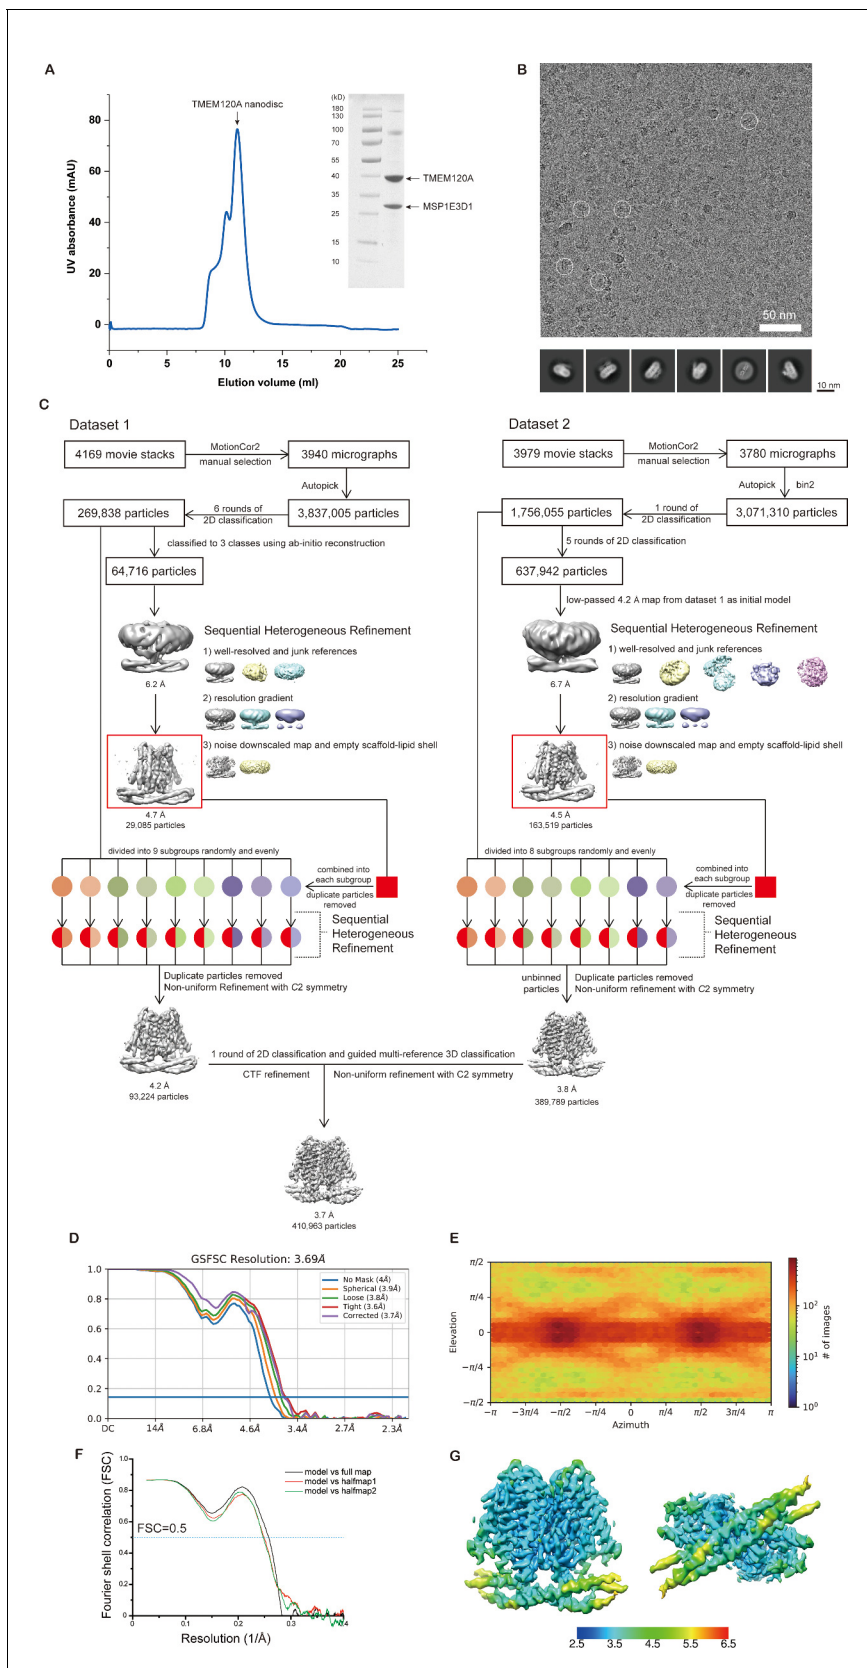

**Figure 2—figure supplement 1.** Sample preparation, cryo-EM data collection, and processing of the *Hs*TMEM120A-CoASH complex reconstituted in nanodiscs. (A) Size-exclusion chromatography of the *Hs*TMEM120A-CoASH complex reconstituted in nanodiscs. The image of sodium dodecyl sulfate-  
Figure 2—figure supplement 1 continued on next page

*Figure 2—figure supplement 1 continued*

polyacrylamide gel electrophoresis (SDS-PAGE) analysis of the peak fraction is shown on the right. (B) Representative cryo-electron microscopy (cryo-EM) image of the *Hs*TMEM120A-CoASH complex in nanodiscs and 2D classification images. (C) The flow chart of data processing, 3D classification, and refinement. (D) The gold standard Fourier shell correlation (GSFSC) curves for the 3D refinement of the final cryo-EM map. Blue, the FSC curve obtained without application of a mask; orange, the FSC curve obtained with a spherical mask; green and red, the FSC curve obtained with loose and tight masks around the protein density, respectively; purple, the FSC curve obtained with a corrected mask. (E) Angular distribution of the particles used for the final reconstruction. (F) The FSC curves between the structural model and full map as well as two half maps. (G) Estimation of the local resolution of the final cryo-EM map. The unit for the numbers labeled nearby the gradient color bar is Å.

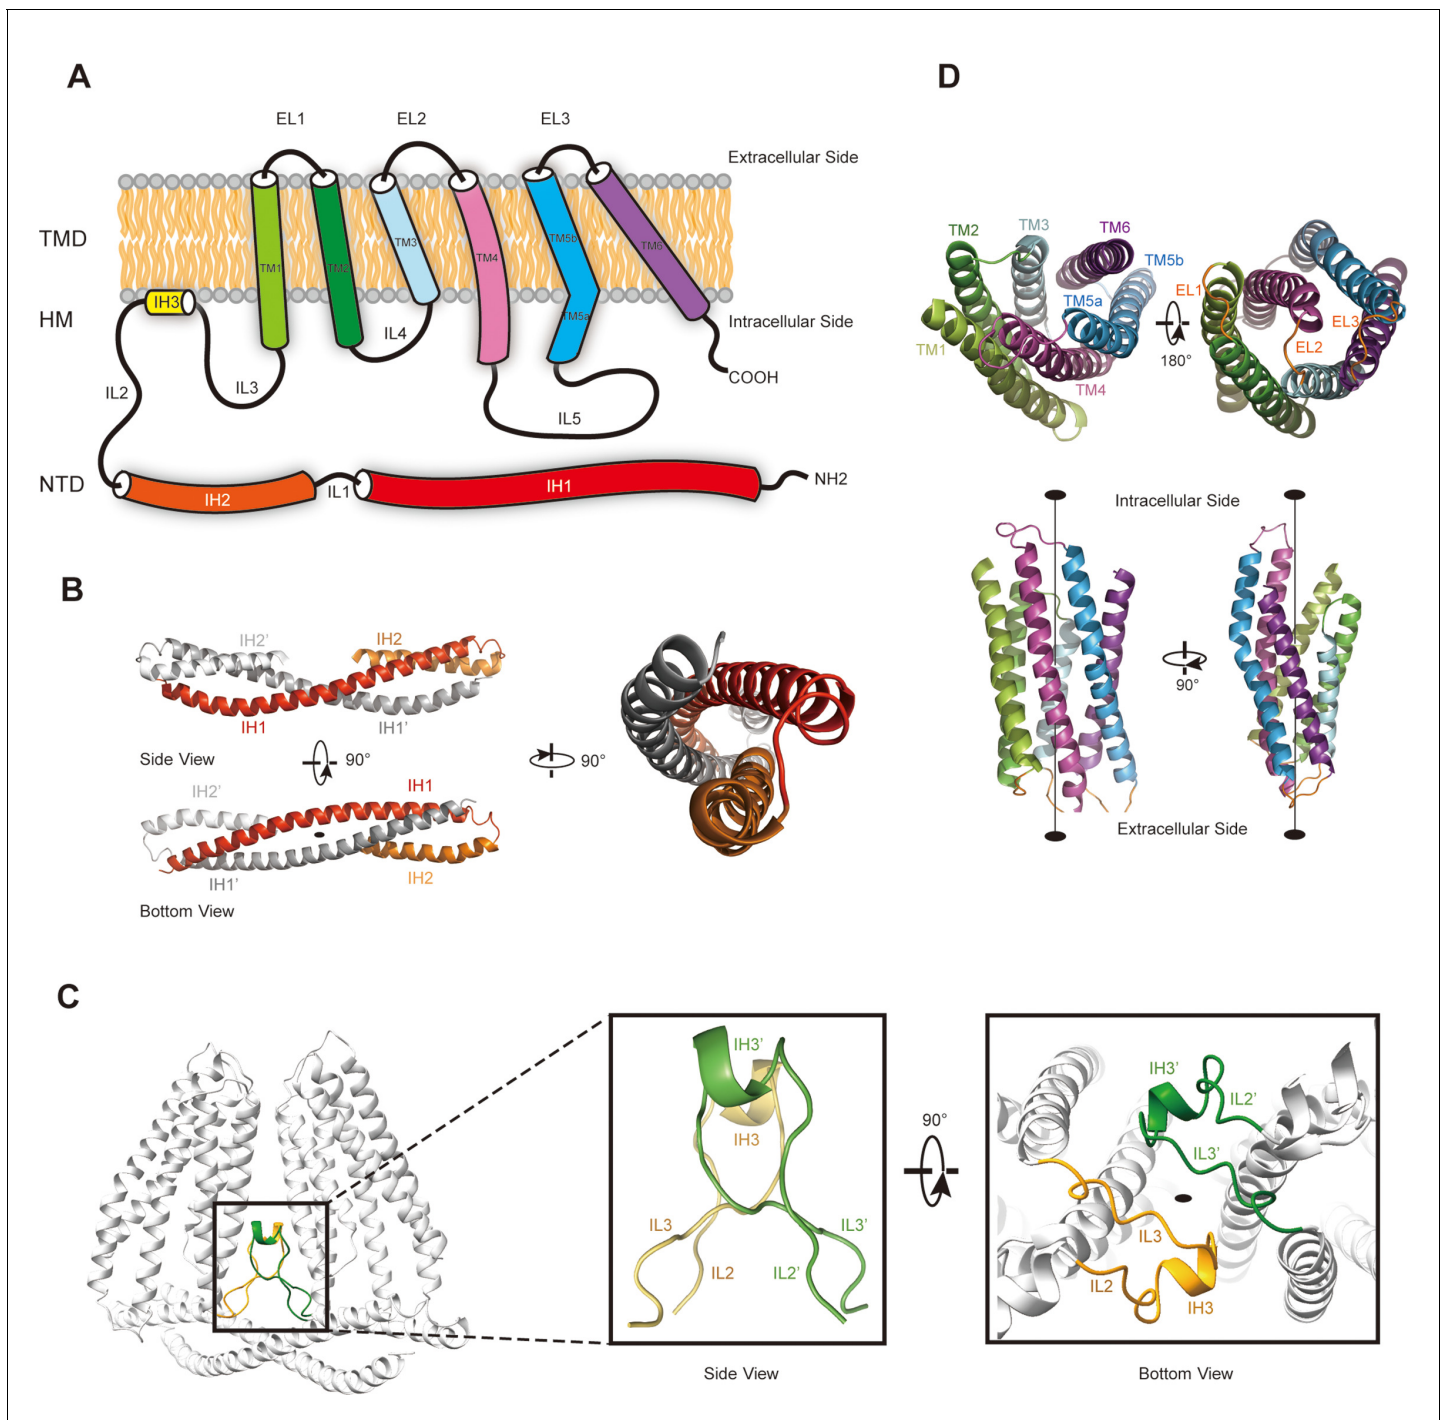

**Figure 3.** The membrane topology and domain structure of *HsTMEM120A* monomer. **(A)** The topology of *HsTMEM120A* monomer and arrangement of different parts relative to the membrane. The  $\alpha$ -helices are presented as cylinder models. IH1-3, the intracellular helices 1-3; TM1-6, transmembrane helices 1-6; IL1-5, intracellular loops 1-5; EL1-3, extracellular loops 1-3. **(B)** The N-terminal domain (NTD) with two long and two short  $\alpha$ -helices. **(C)** The role of hinge-like motif (HM) in mediating dimerization of *HsTMEM120A* at the monomer-monomer interface. The solid elliptical rings in **(B)** and **(C)** indicate the central twofold axis of *HsTMEM120A* homodimer. **(D)** The transmembrane domain with a bundle of six transmembrane helices. TM1, TM2, and TM3 are related to TM6, TM5, and TM4 through a pseudo-C2 axis as indicated in the lower half.



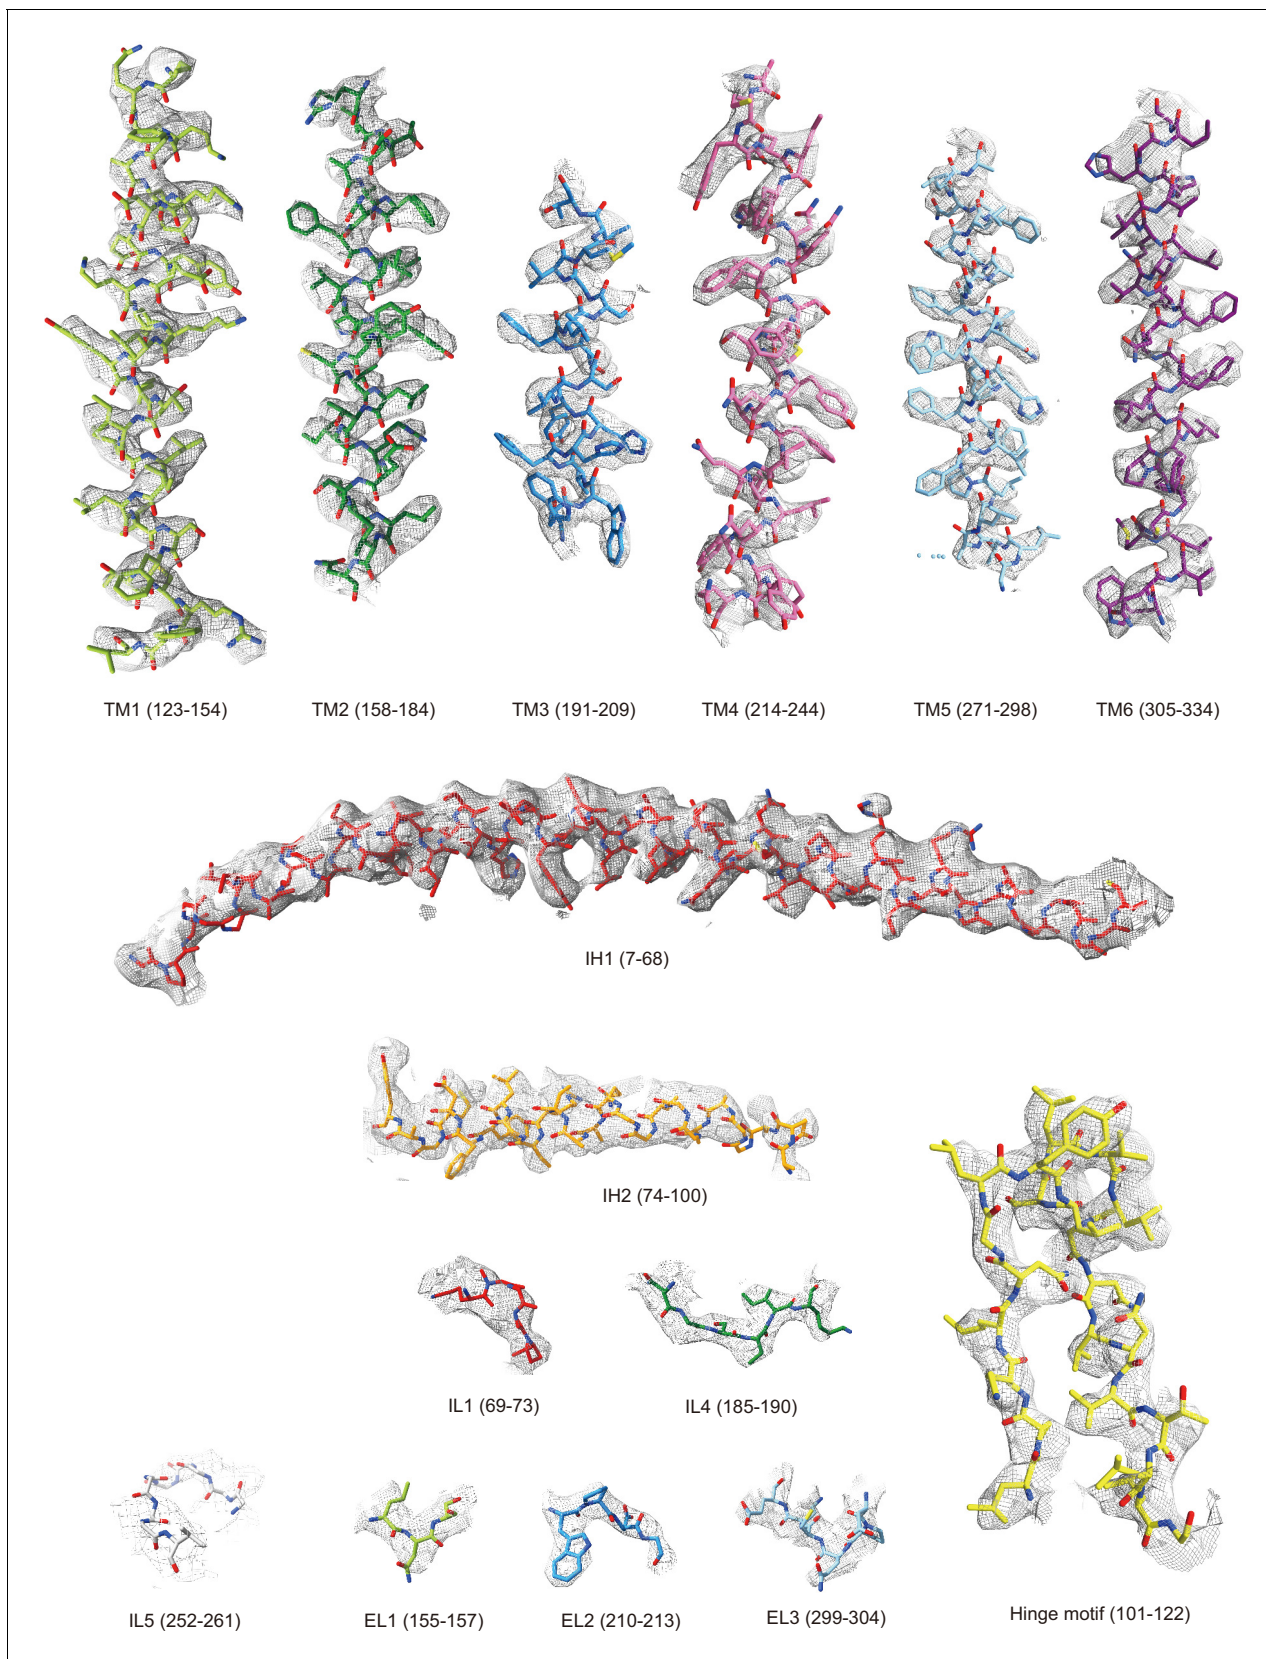

**Figure 3—figure supplement 1.** Fitting of the structural model with the cryo-EM densities of various local regions of *HsTMEM120A* in nanodiscs. The refined structural models superposed on the map are shown as stick models. The map is contoured at 6.7–13.1 rmsd level. TM2 (158–184), TM3 (191–

*Figure 3—figure supplement 1 continued on next page*

Figure 3—figure supplement 1 continued

209), TM4 (214–244), and EL2 (210–213), 13.1 rmsd; hinge motif (101–122), TM1 (123–154), and TM5 (271–298), 11.0 rmsd; TM6 (305–334), EL1 (155–157), and IL4 (185–190), 9.1 rmsd; IH1 (7–68), IH2 (74–100), IL1 (69–73), and EL3 (299–304), 6.73 rmsd; IL5 (252–261), 4.33 rmsd.

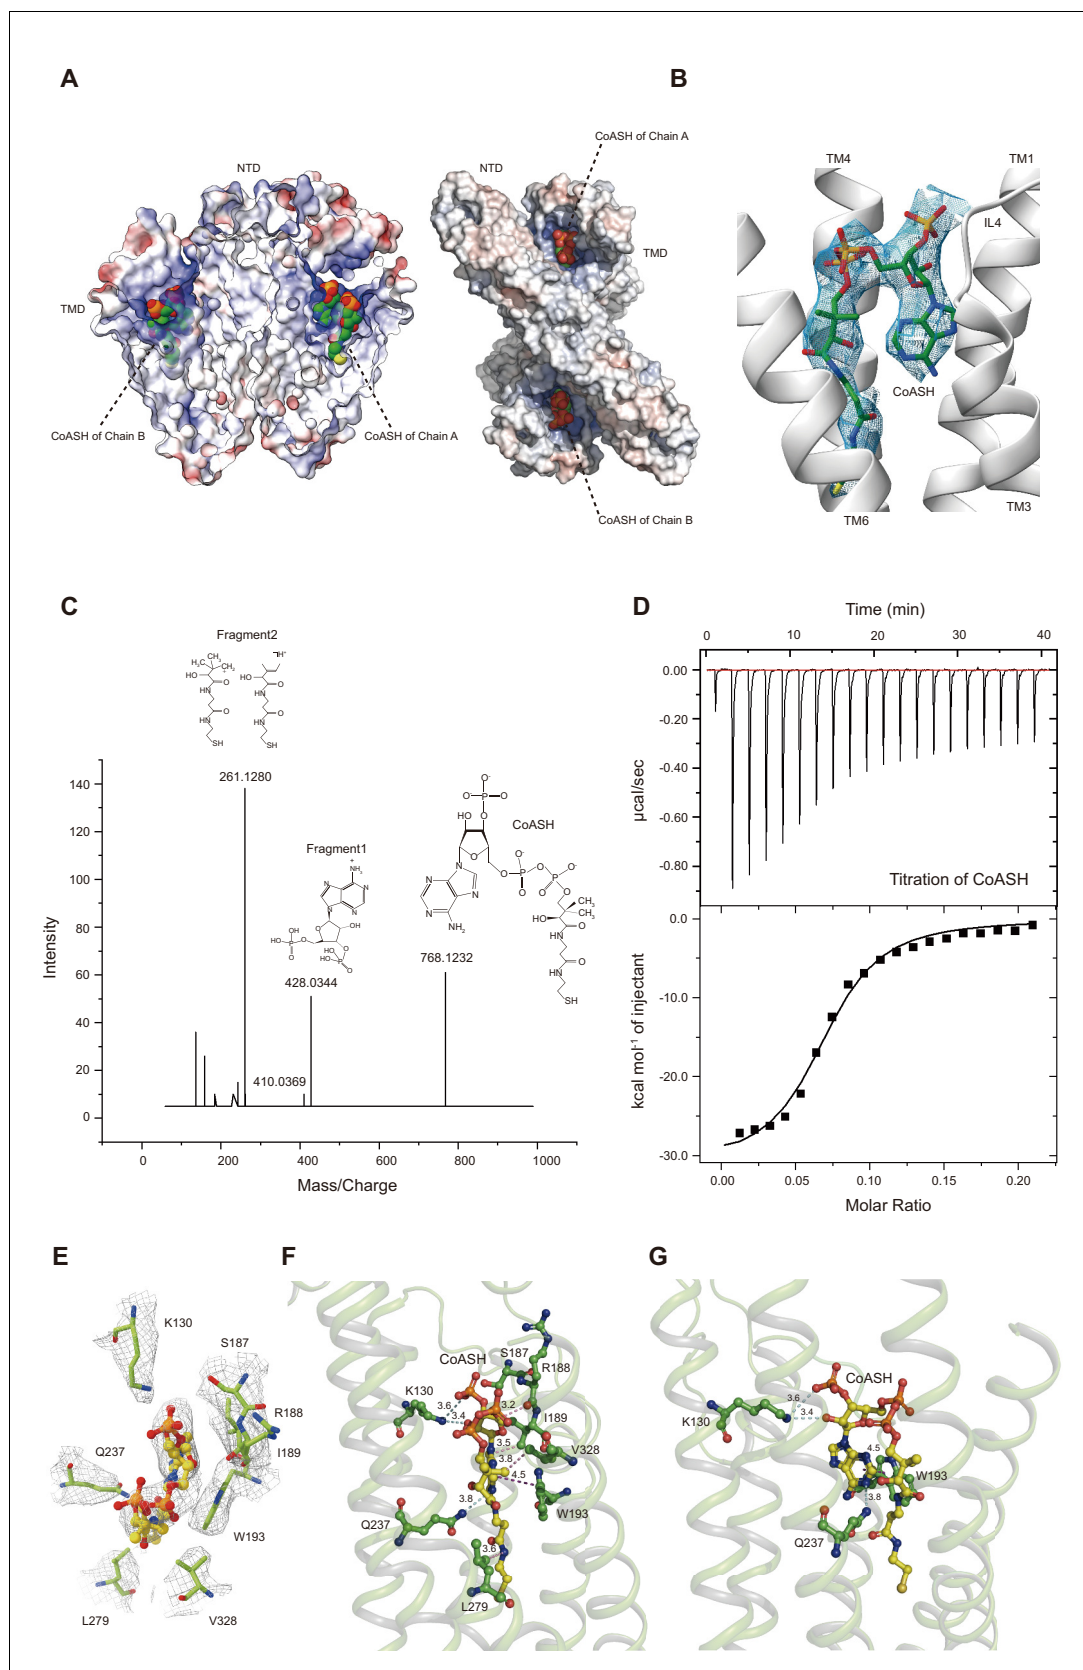

**Figure 4.** *HsTMEM120A* contains an internal CoASH-binding site within each monomer. **(A)** Electrostatic potential surface presentation of *HsTMEM120A* dimer reveals a deep coenzyme A (CoASH)-binding cavity with an electropositive surface. Left, side view; right, top view along the dimer axis. Figure 4 continued on next page

## Figure 4 continued

the membrane normal from the intracellular side. The CoASH molecules are presented as sphere models. (B) The cryo-electron microscopy (cryo-EM) density of the ligand molecule bound to *HsTMEM120A* fitted with a refined structural model of CoASH. (C) Mass spectrometry analysis of the small molecule extracted from the purified *HsTMEM120A* protein. The chemical models of CoASH molecule and its fragments are shown above the corresponding peaks with *m/z* values 768.1232, 428.0344, and 261.1280. (D) Isothermal titration calorimetry analysis on the kinetic interactions between CoASH and *HsTMEM120A*. The background heat of control was subtracted from the heat generated during binding of CoASH to *HsTMEM120A*. The result is fit with the single-site-binding isotherm model with  $\Delta H = -31.09 \pm 0.97$  kcal/mol and  $K_d = 0.685 \pm 0.045$   $\mu$ M. (E) Top view of the CoASH-binding site from the cytosolic side. The cryo-EM densities of CoASH and the surrounding amino acid residues (contoured at 9.5 rmsd) are superposed on the structural model. (F, G) Side views of the detailed interactions between CoASH and the adjacent amino acid residues of *HsTMEM120A* from two different angles. The blue dotted lines indicate the hydrogen bonds or the salt bridge between Lys130 NZ and CoASH O2B (3.6 Å), Lys130 NZ and CoASH O8A (3.4 Å), and Gln237 NE2 and CoASH N1A (3.8 Å). The purple dotted line shows the  $\pi$ - $\pi$  interaction between Trp193 and CoASH at 4.2–4.5 Å distances. The pink dotted lines exhibit the non-polar interactions between CoASH and the adjacent residues (Arg188, Ile189, Leu279, and Val328) at <4 Å distance.



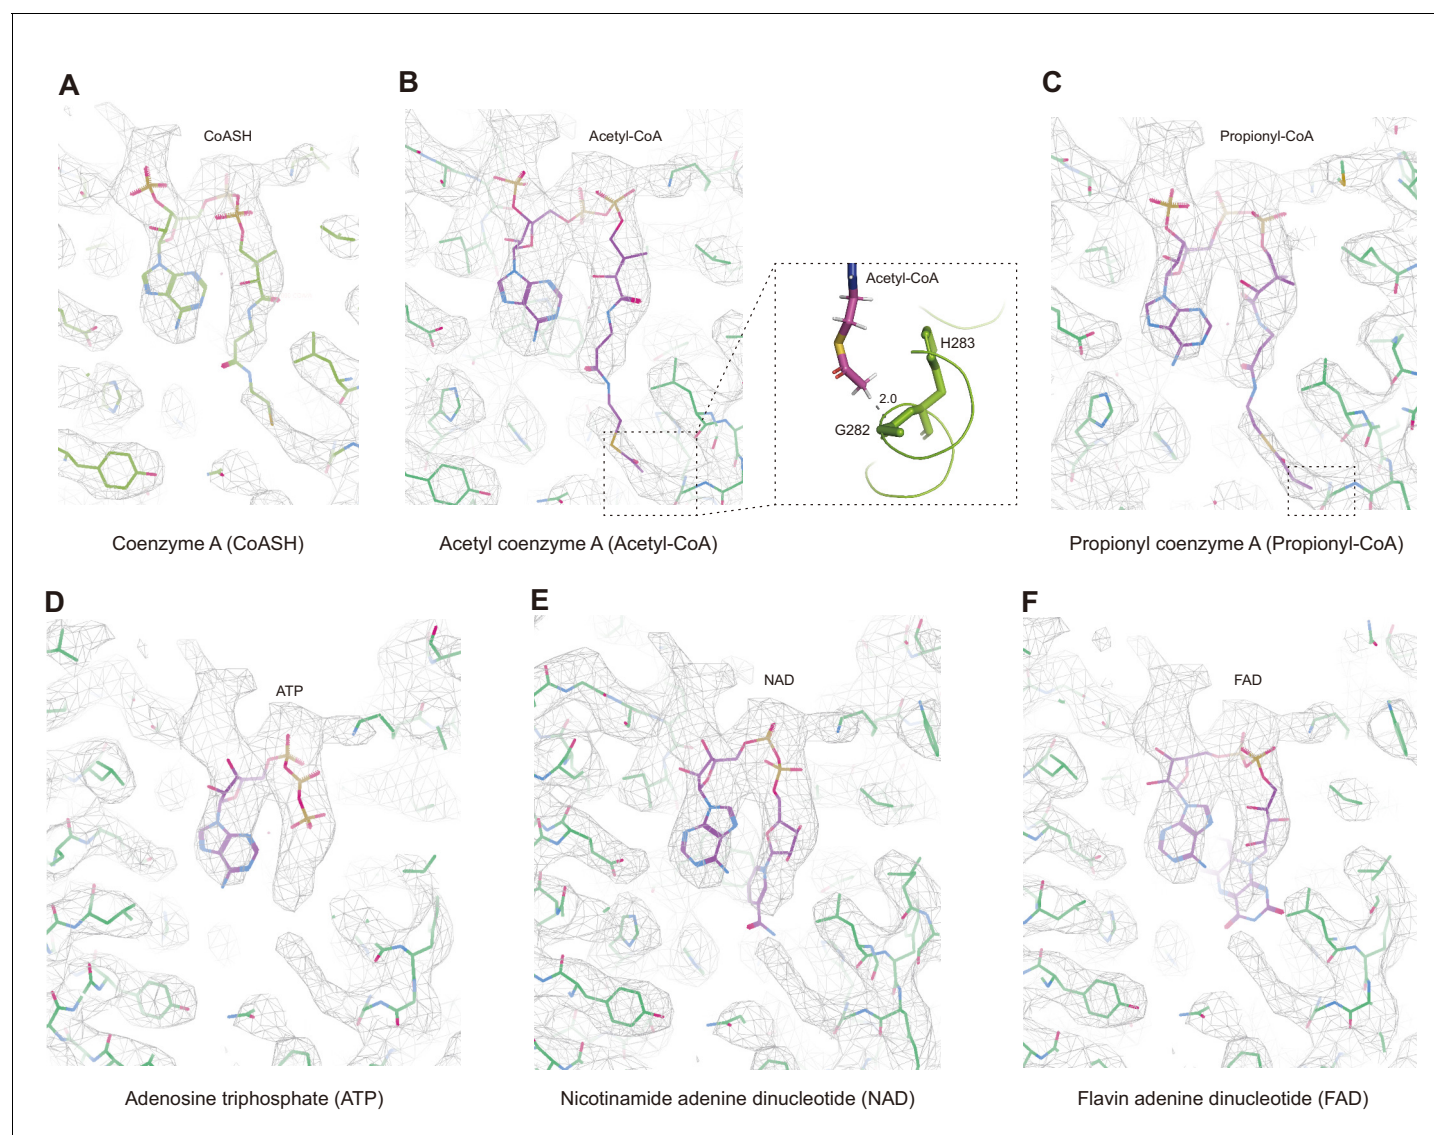

**Figure 4—figure supplement 1.** Fitting of the cofactor density with various small-molecule models. (A) Coenzyme A (CoASH). (B) Acetyl-CoA. The area in the dashed box indicates the local region with clashes between the acetyl group of acetyl-CoA model and Gly282-His283 region of the protein. (C) Propionyl-CoA. The local region in the dashed box at the bottom right has a clash between the propionyl group of propionyl-CoA model and the protein. For palmitoyl- or oleoyl-CoA, the fatty acyl group is too long to fit in the density. (D) Adenosine triphosphate (ATP). There is an extra density of the cofactor not covered by the ATP model. (E) Nicotinamide adenine dinucleotide (NAD). Note that the bulky nicotinamide group does not match with the cofactor density. (F) Flavin adenine dinucleotide (FAD). The bulky flavin group of FAD is not covered by the cofactor density. In (A–F), the cryo-electron microscopy (cryo-EM) map of HsTMEM120A in the nanodisc is contoured at 6.4 rmsd level.

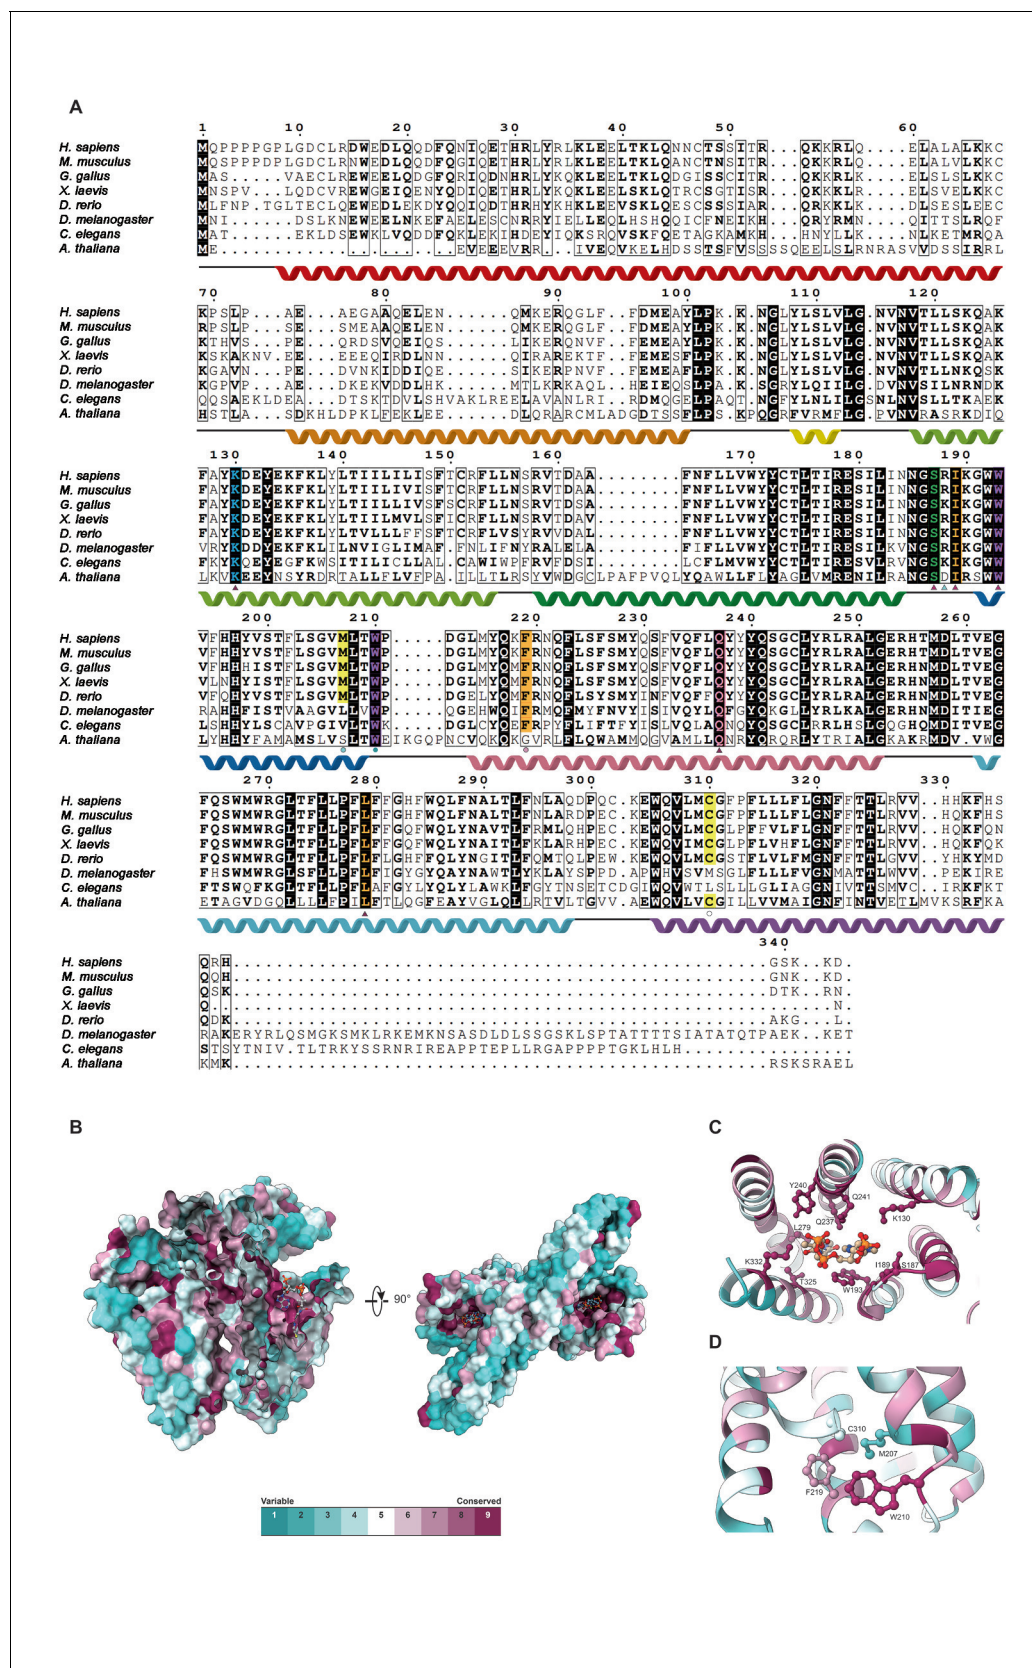

**Figure 4—figure supplement 2.** The conserved features of TMEM120A. (A) Sequence alignment of *HsTMEM120A* with other homologs from different species. The highly conserved amino acid residues are highlighted in a dark background. The triangles denote the coenzyme A (CoASH)-binding site. Figure 4—figure supplement 2 continued on next page

## Figure 4—figure supplement 2 continued

residues, and the color code is the same as the one for ConSurf conservation score bar shown in (B). The circles indicate the amino acid residues located in the narrowest region of channel pore. The  $\alpha$ -helices and associated loops are indicated by the helical ribbons and dark lines labeled above the sequences, respectively. Accession codes: *Homo sapiens* (NP\_114131.1), *Mus musculus* (NP\_766129.1), *Gallus gallus* (XP\_040543083.1), *Xenopus laevis* (NP\_001091170.1), *Danio rerio* (NP\_001076452.1), *Drosophila melanogaster* (NP\_001245509.1), *Caenorhabditis elegans* (NP\_001370801.1), and *Arabidopsis thaliana* (CAD5314357.1). (B) Mapping of the conserved amino acid residues on the surface of HsTMEM120A structure. The conserved residues are shown in dark pink, while the variable ones are in cyan. (C, D) The amino acid residues located at the CoASH-binding site and the constriction area, respectively.



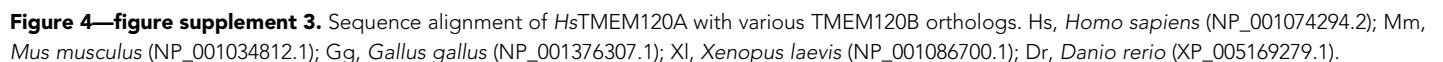

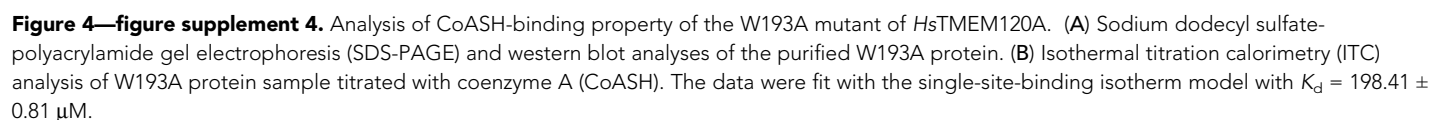

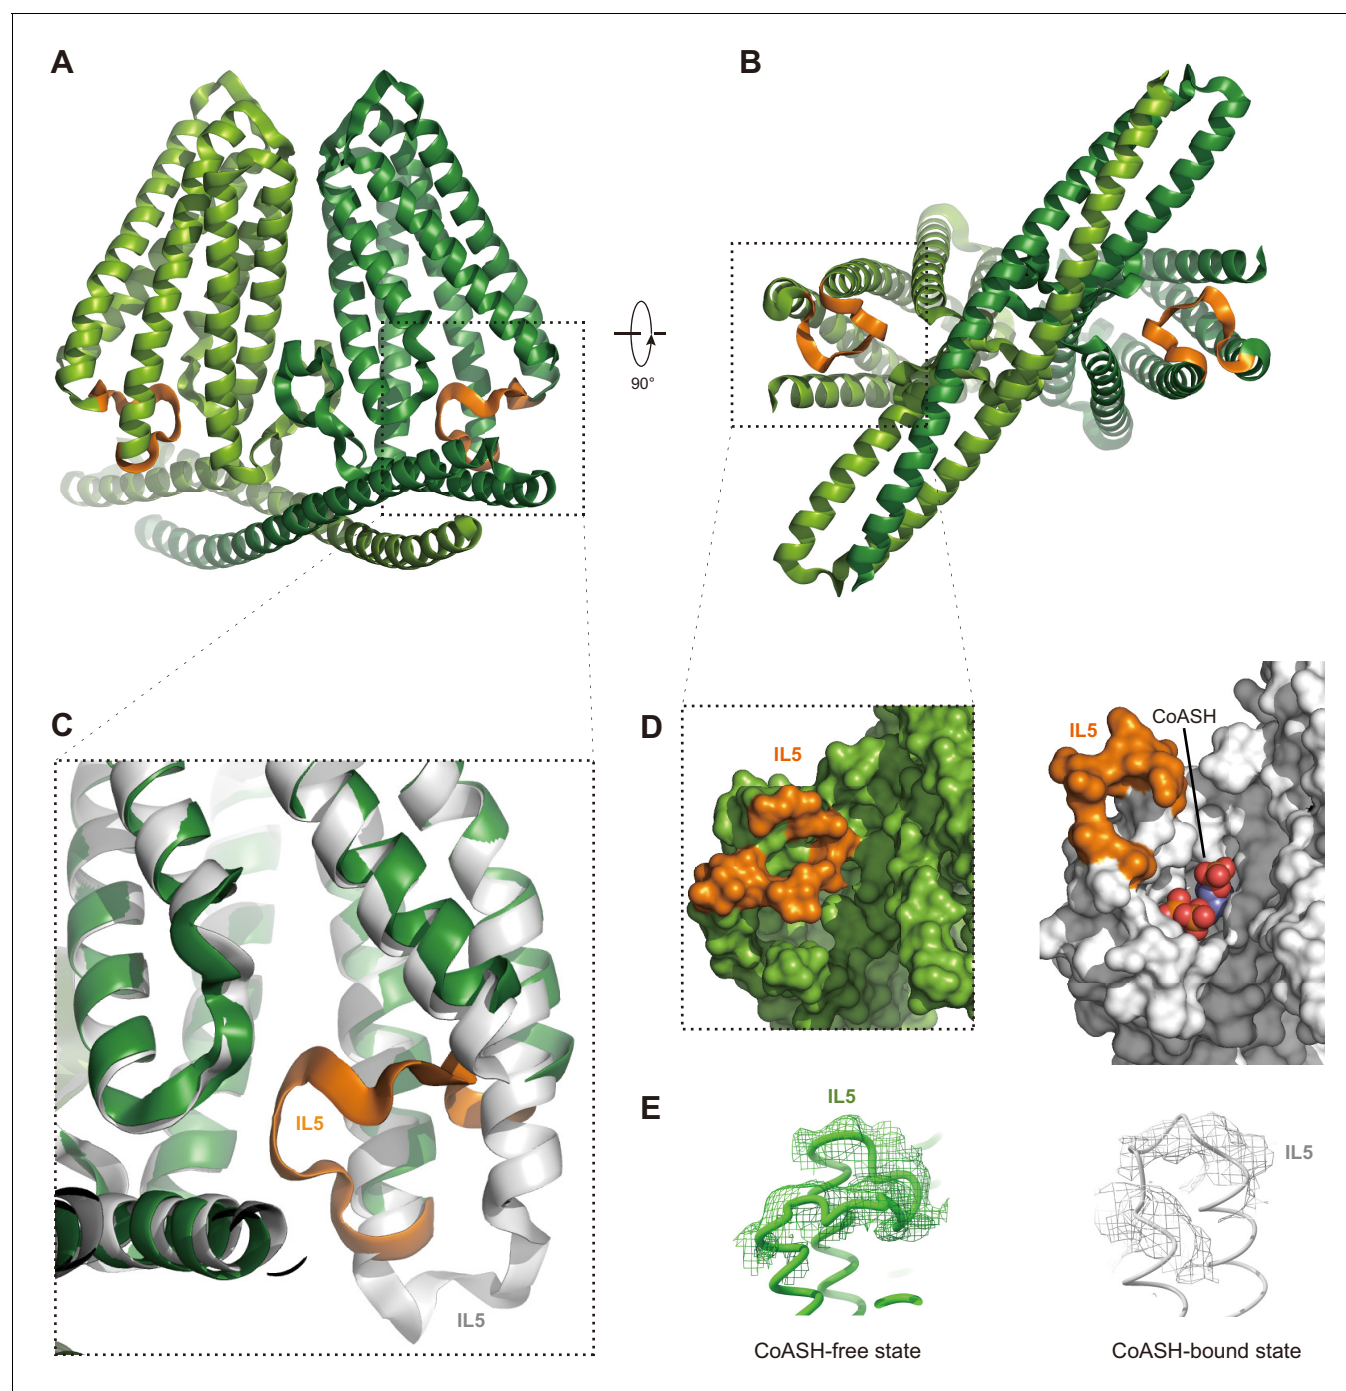

**Figure 5.** Structure of HsTMEM120A at the CoASH-free state in comparison with the CoASH-bound state. (A, B) The overall structure of HsTMEM120A without coenzyme A (CoASH) bound. The side view (A) and bottom view from intracellular side (B) are shown. The two monomers are colored light and dark green, respectively, while the intracellular loop IL5 is highlighted in orange. (C) Superposition of the structures of HsTMEM120A at the CoASH-free state (green for the bulk region and orange for IL5) and CoASH-bound state (silver). The view is similar to the one in the dashed box of panel (A). (D) Surface presentation of the region around the CoASH-binding site in the CoASH-free (left) and CoASH-bound (right) HsTMEM120A structures. The IL5 loop region is highlighted in orange. (E) Cryo-electron microscopy (cryo-EM) densities of the IL5 loop in the CoASH-free (left, contoured at 4.5 rmsd) and CoASH-bound (right, contoured at 3.3 rmsd) HsTMEM120A structures.

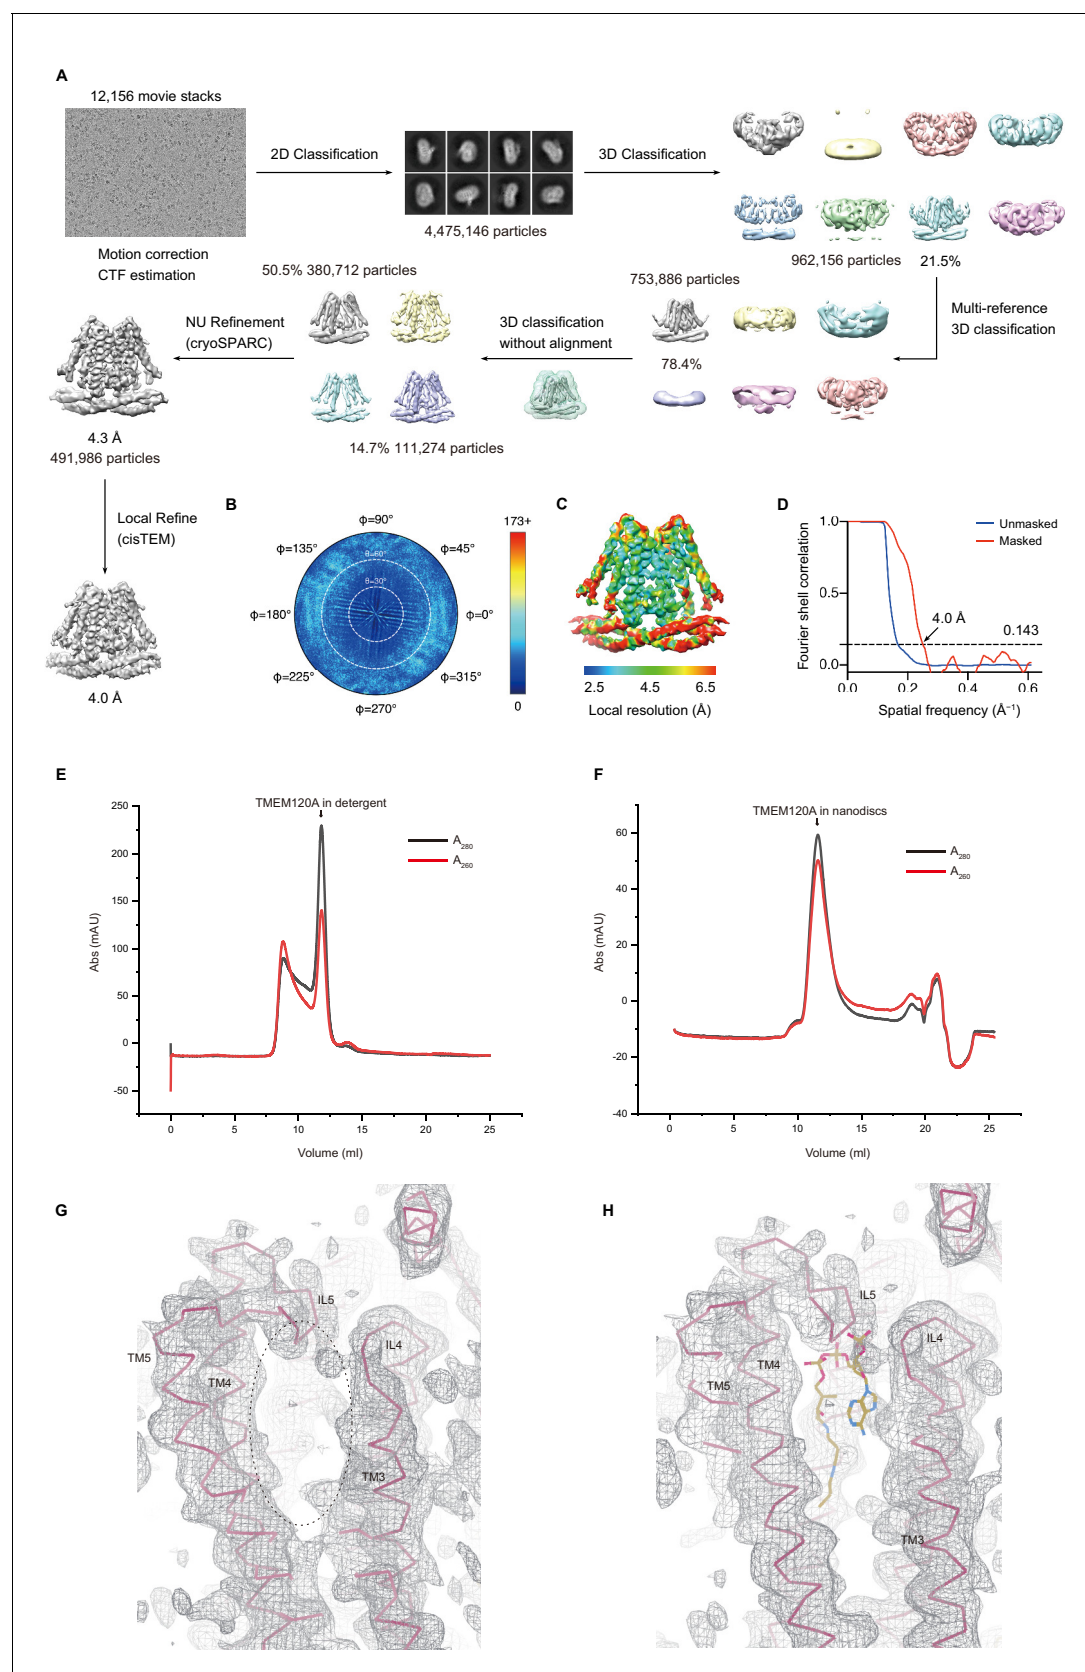

**Figure 5—figure supplement 1.** Cryo-EM data collection and processing of HsTMEM120A protein purified in detergent micelle. (A) The flow chart of data collection, 2D classification, 3D classification, and refinement process. A total of 12,156 movie stacks were collected, and a representative motion-  
Figure 5—figure supplement 1 continued on next page

## Figure 5—figure supplement 1 continued

corrected micrograph is shown. Particles were subjected to several rounds of 2D and 3D classifications. The final map was generated by applying local refine procedure in cisTEM. (B) Angular distribution diagram of the particles contributing to the final reconstruction. (C) Estimation of the local resolution in the sharpened 4.0 Å cryo-electron microscopy (cryo-EM) map of HsTMEM120A protein. (D) The Fourier shell correlation (FSC) curves of the map with (red) or without (blue) an applied mask. The resolution was estimated according to the gold standard Fourier shell correlation (GSFSC) (FSC = 0.143) criterion. (E) Gel filtration profile of HsTMEM120A protein eluted in a detergent solution. (F) Gel filtration profile of HsTMEM120A reconstituted in nanodiscs. Note the apparently lower  $A_{260}/A_{280}$  peak ratio in (E) when compared to the one in (F). (G) The local area in the coenzyme A (CoASH)-binding cavity of the HsTMEM120A structure solved in the detergent. The elliptical dash ring indicates the CoASH-binding site as observed in the structure of the nanodisc complex. (H) A CoASH model from the nanodisc complex structure is superposed on the map region shown in (G). Note that there is no density feature accounting for the CoASH molecule in the cavity. The cryo-EM map at 4.0 Å shown in (G) and (H) is contoured at 5.0 V/4.5 rmsd level, while the other map at 4.2 Å resolution contoured at 0.25 V/3.5 rmsd level shows a similar weak density feature in the cavity and a more continuous density for the IL5 loop.



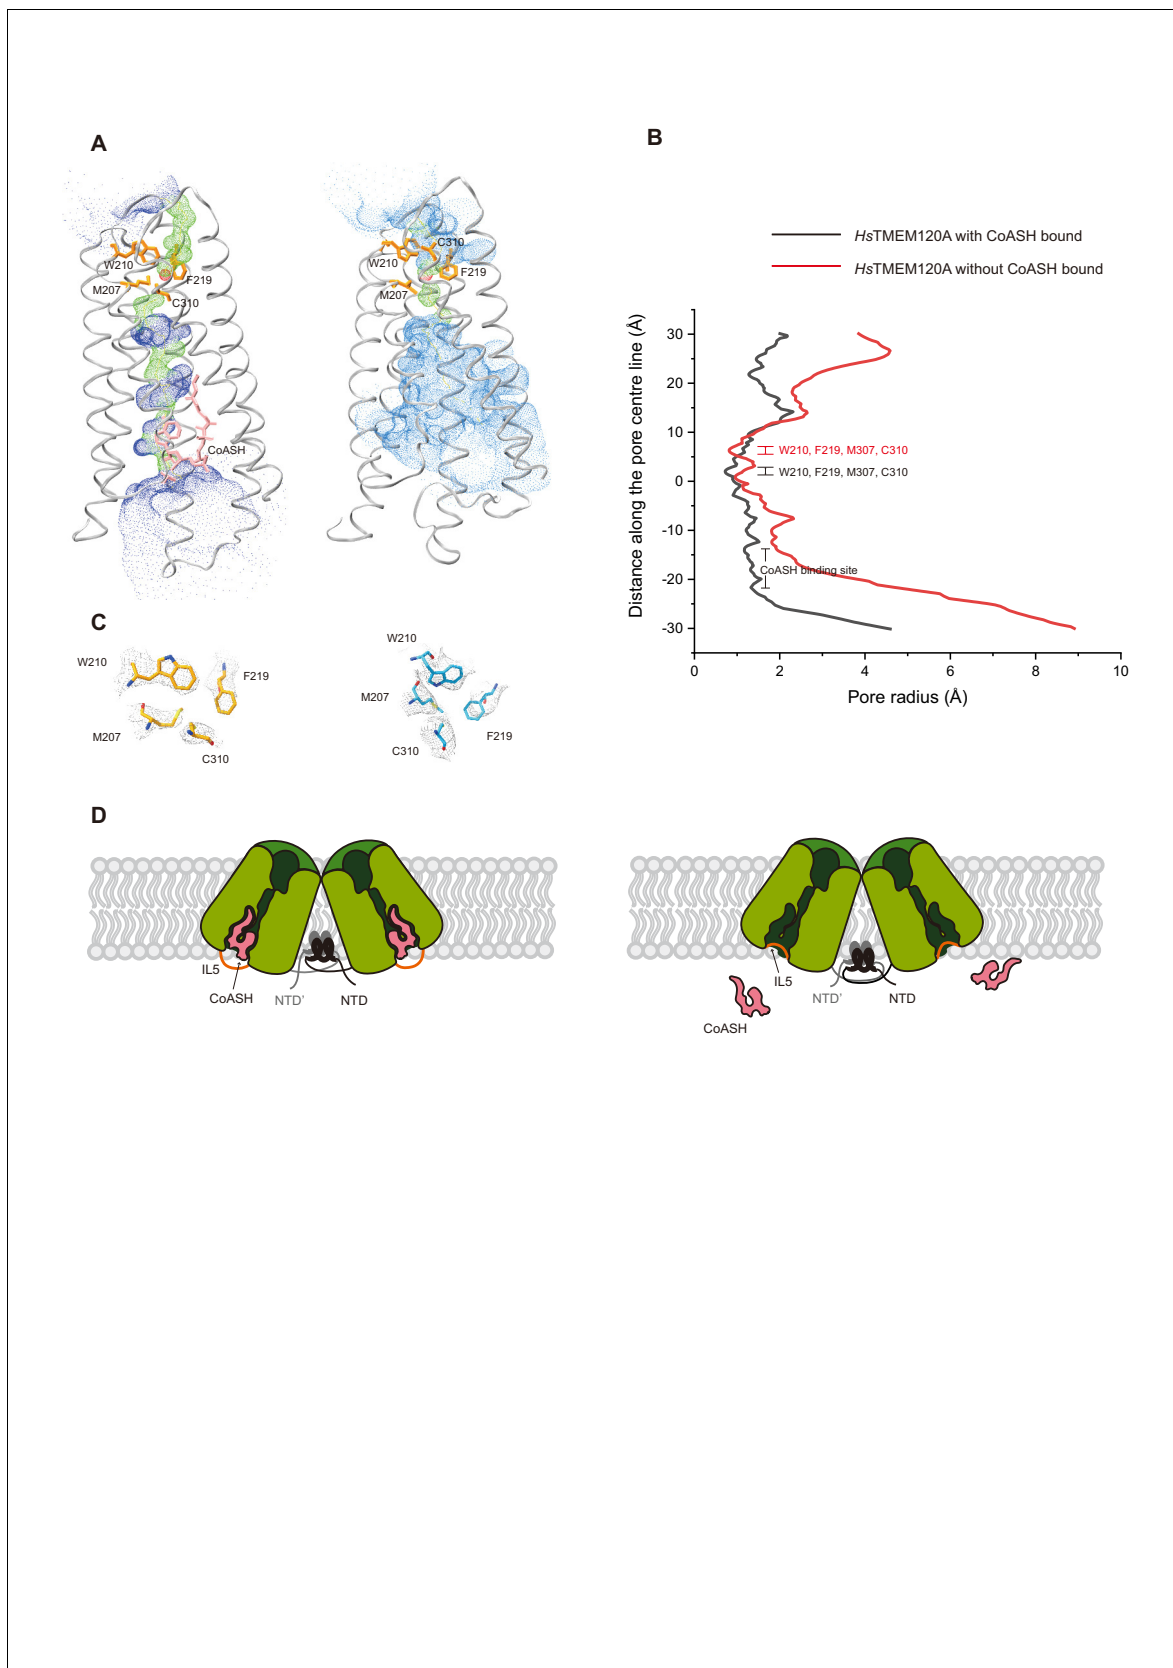

**Figure 5—figure supplement 2.** The occluded cavity of *HsTMEM120A* with CoASH bound in comparison with the open cavity without CoASH bound. (A) Hole profiles of the coenzyme A (CoASH)-bound (left) and CoASH-free (right) *HsTMEM120A* structures. Red, pore radius  $< 1.15 \text{ \AA}$ ; green,  $1.15 \text{ \AA} < \text{pore radius} < 1.5 \text{ \AA}$ . Figure 5—figure supplement 2 continued on next page

*Figure 5—figure supplement 2 continued*

pore radius  $< 2.30$  Å; blue, pore radius  $> 2.30$  Å. The amino acid residues surrounding the narrowest site on the extracellular side and the CoASH molecule are shown as stick models in orange and pink, respectively. **(B)** Distribution of the pore radius along the central axes of the *Hs*TMEM120A-CoASH complex and CoASH-free *Hs*TMEM120A. The constricted area around CoASH on the intracellular side and four amino acid residues on the extracellular side are labeled on the right. **(C)** Cryo-electron microscopy (cryo-EM) densities of the four amino acid residues at the narrowest site on the extracellular side of *Hs*TMEM120A at the CoASH-bound (left, contoured at 12.4 rmsd) and CoASH-free (right, contoured at 3.5 rmsd) states. **(D)** A mechanistic model accounting for two different functional states of TMEM120A in the cells.
